# Supplementary material for: Design and Performance Evaluation of a Novel Spiral Head-Stem Trunnion for Hip Implants Using Finite Element Analysis
Source: MDPI journal article supplement (doi:10.3390/ma16041466), 2023-02-09
Supplement: s1 [file s1]

## Supplementary Document

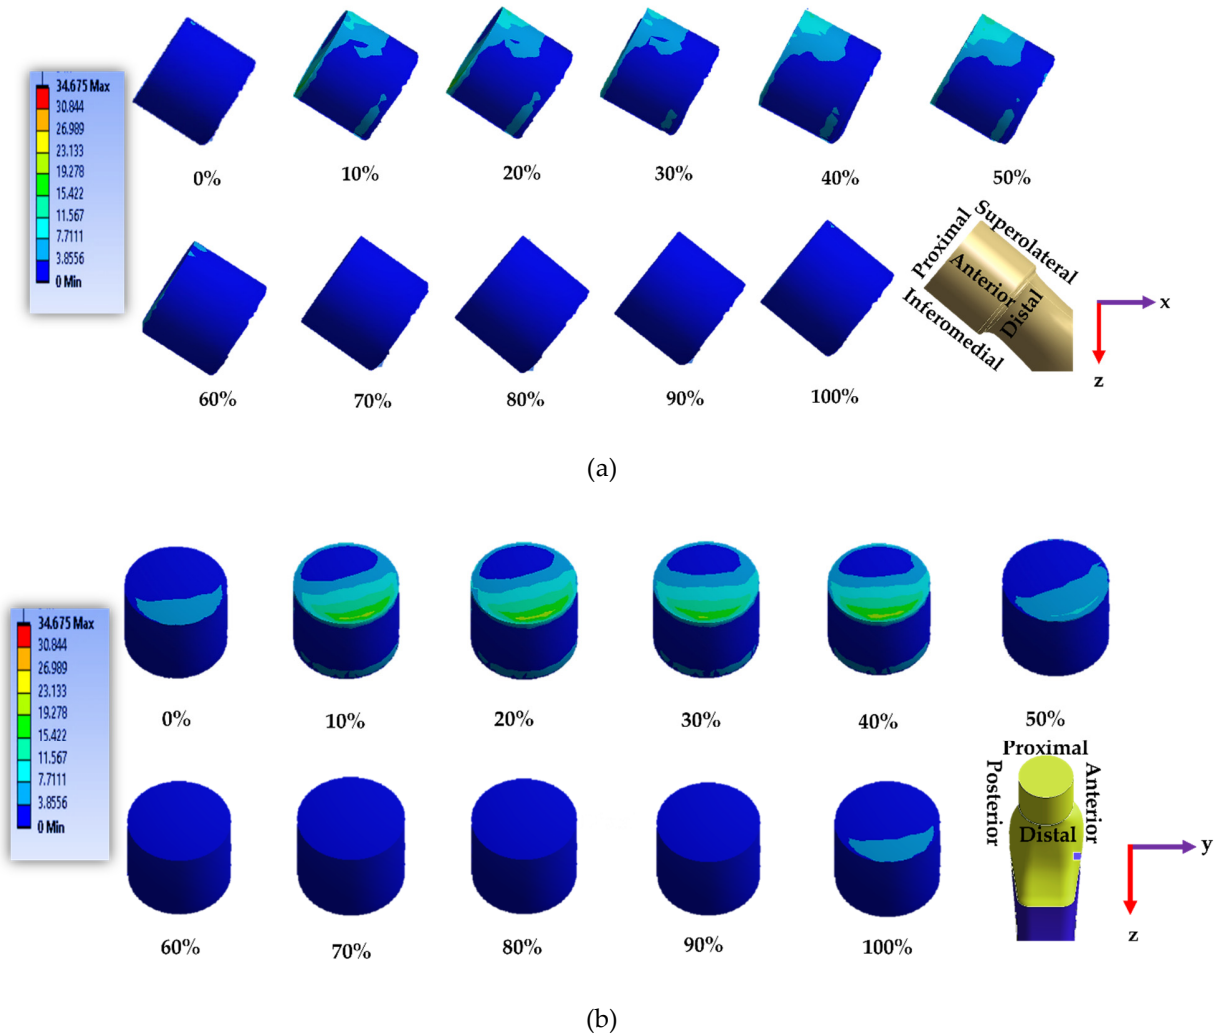

Figure S1. Contact Pressure Distribution Over Smooth Head-Neck Tapered Joint in, (a) Front and (b) Right Side View for Walking Loading Condition.

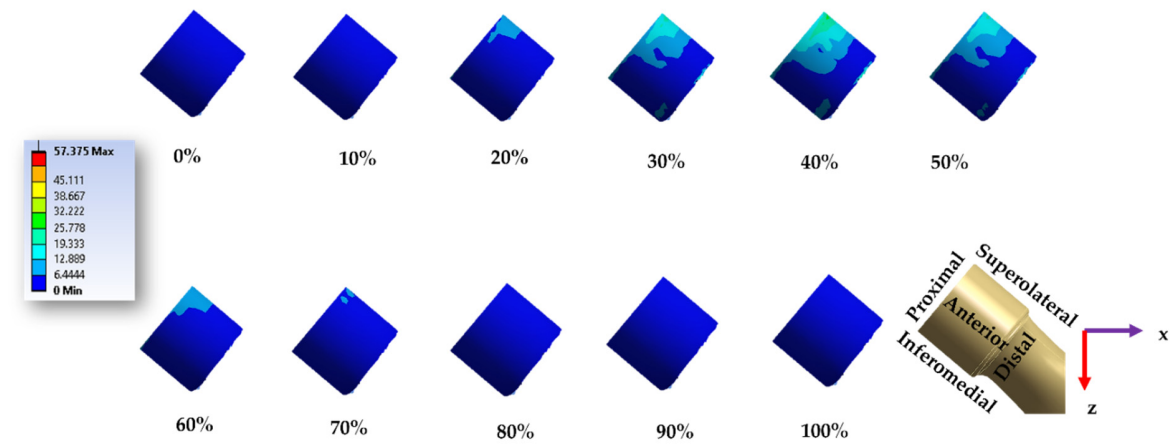

(a)

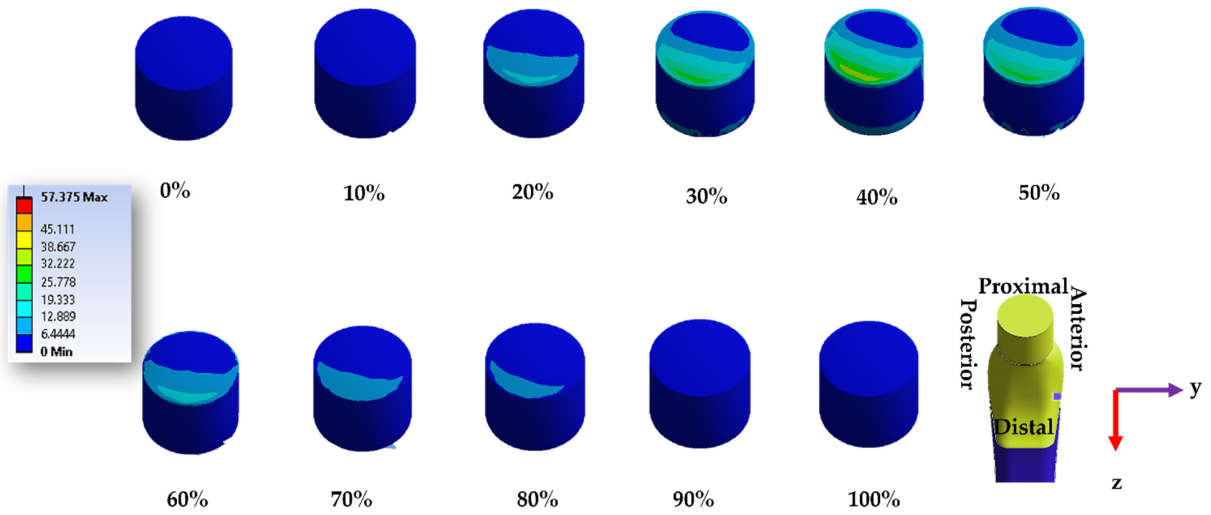

(b)

Figure S2. Contact Pressure Distribution Over Smooth Head-Neck Tapered Joint in, (a) Front and (b) Right Side View for Jogging Loading Condition.

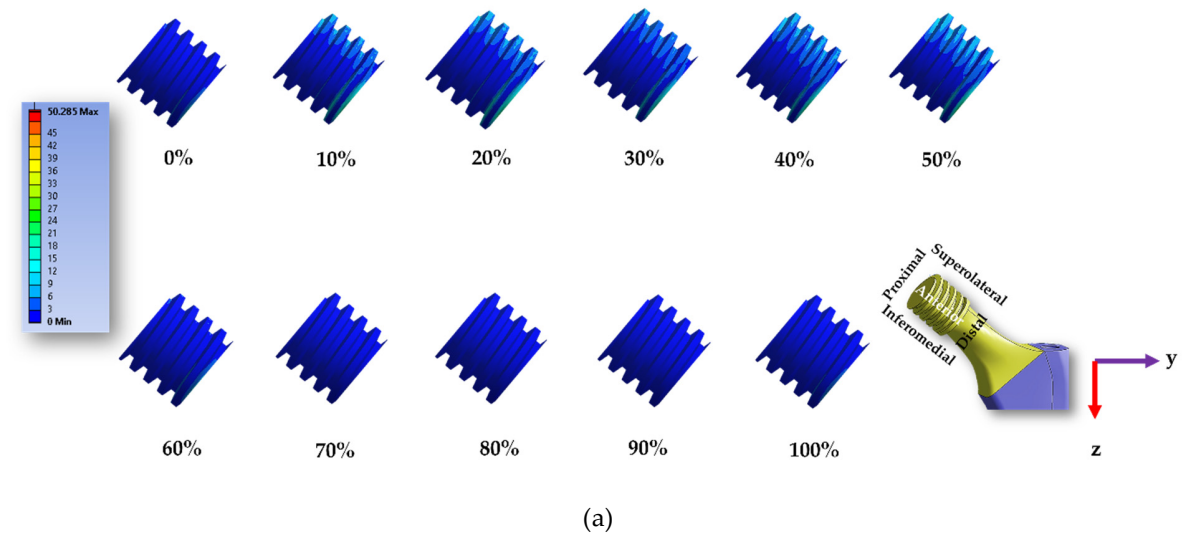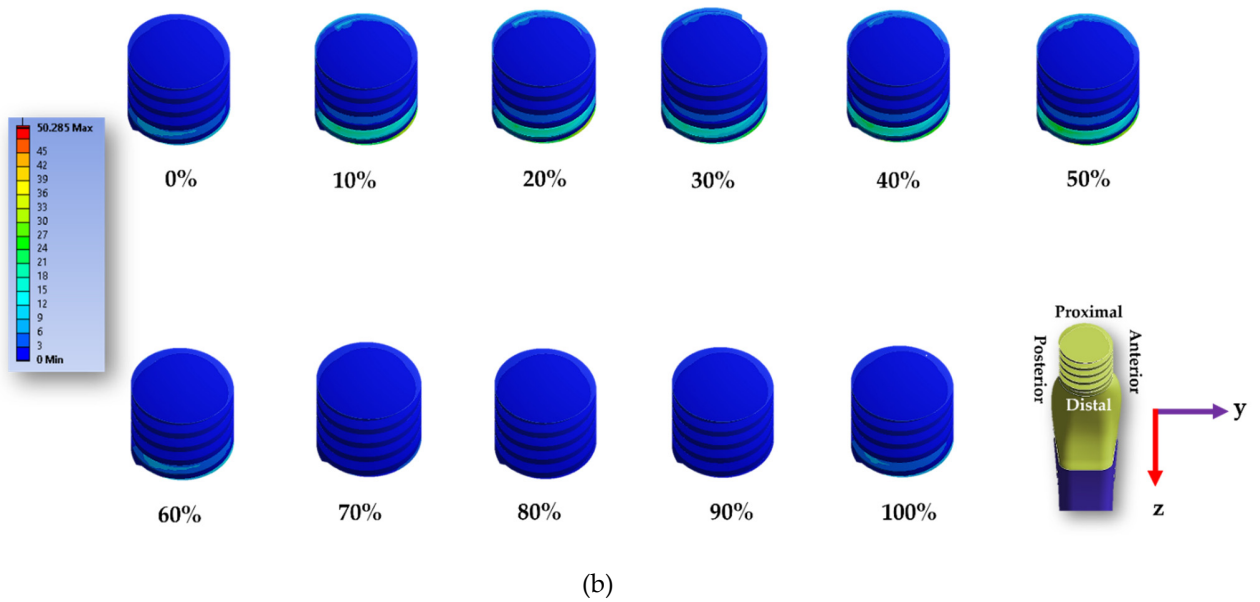

Figure S3. Contact Pressure Distribution Over Spiral Head-Neck Tapered Joint in, (a) Front and (b) Right Side View for Walking Loading Condition.

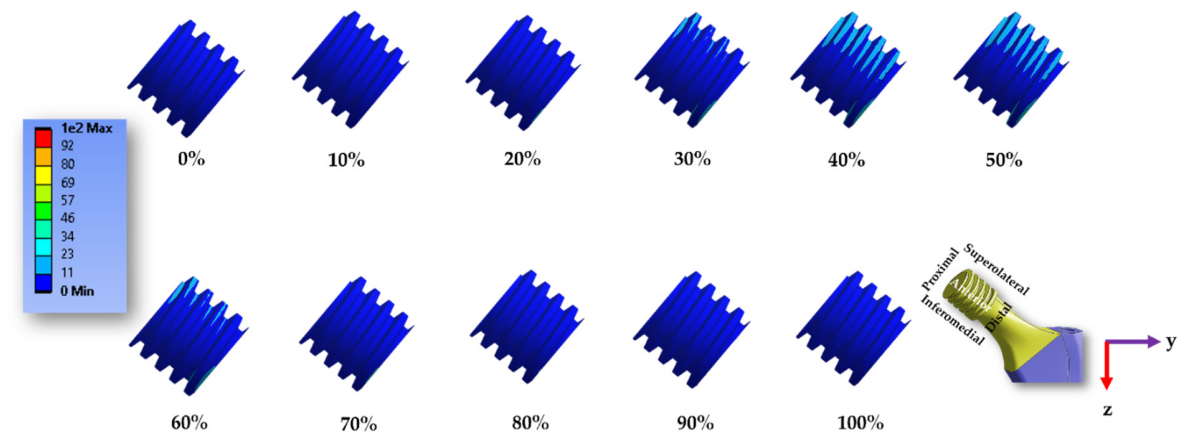

(a)

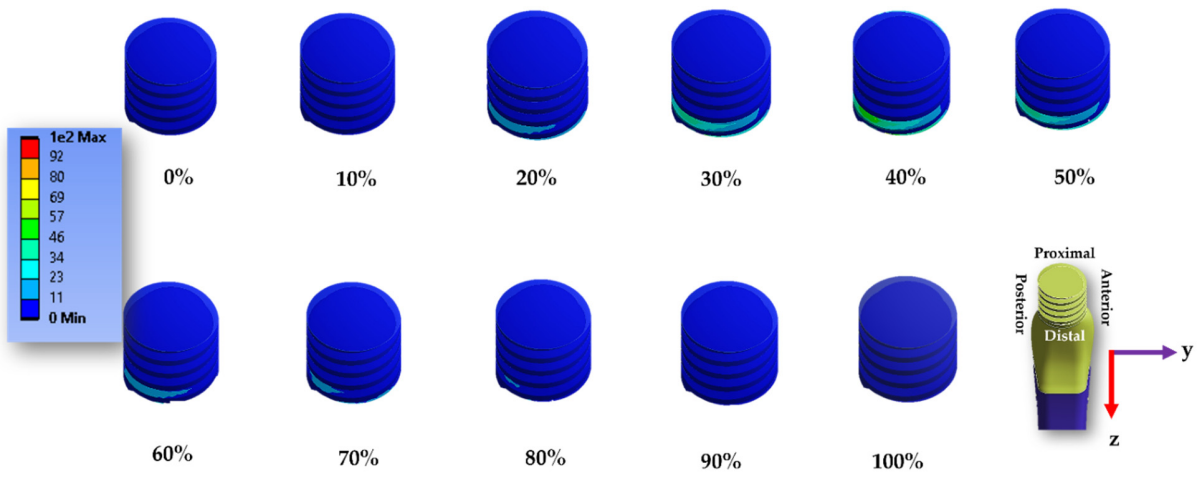

(b)

Figure S4. Contact Pressure Distribution Over Spiral Head-Neck Tapered Joint in, (a) Front and (b) Right Side View for Jogging Loading Condition.

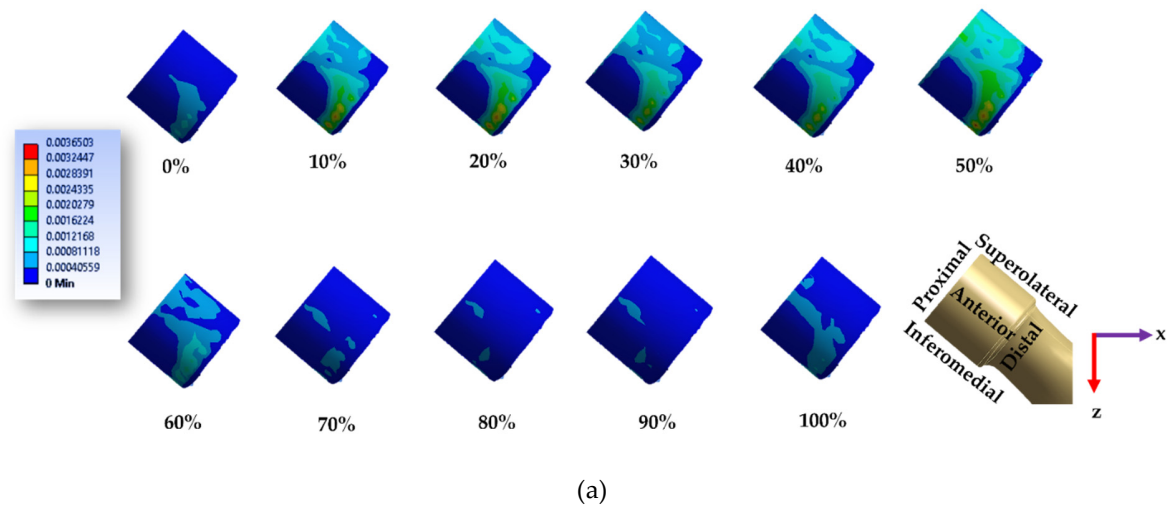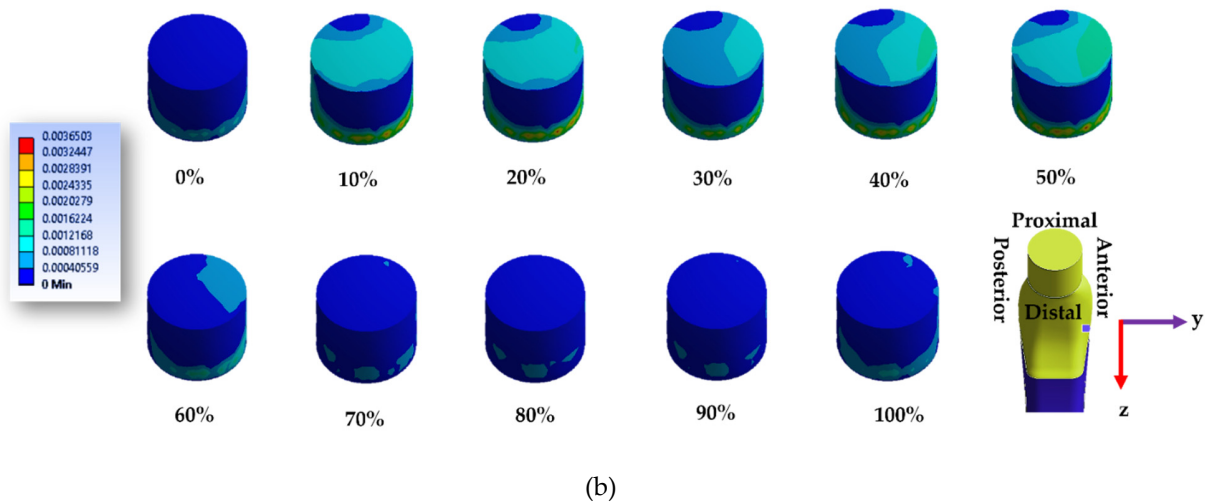

Figure S5. Sliding Distance Distribution Over Smooth Head-Neck Tapered Joint in, (a) Front and (b) Right Side View for Walking Loading Condition.

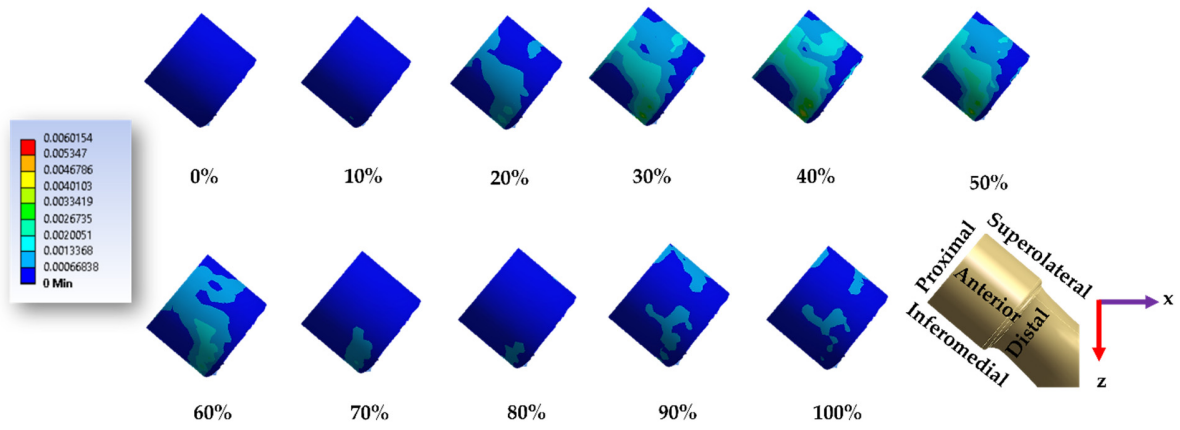

(a)

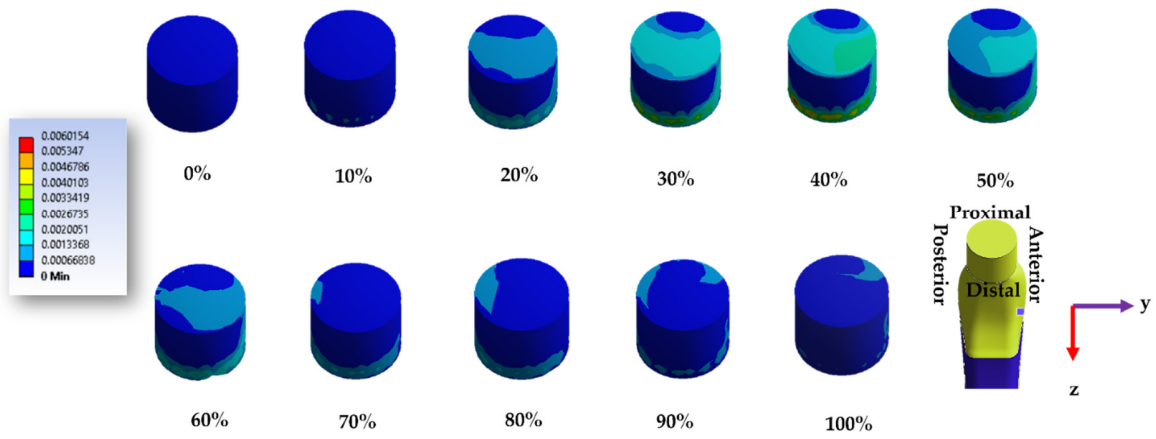

(b)

Figure S6. Sliding Distance Distribution Over Smooth Head-Neck Tapered Joint in, (a) Front and (b) Right Side View for Jogging Loading Condition.

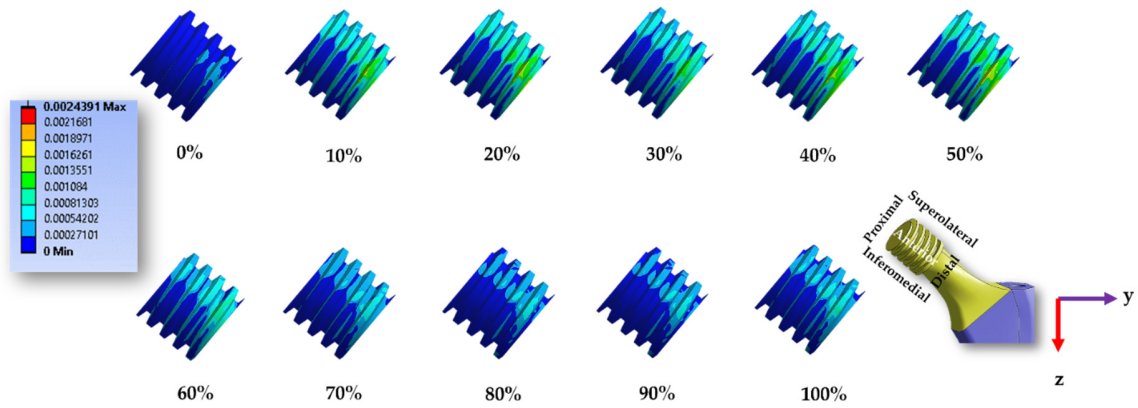

(a)

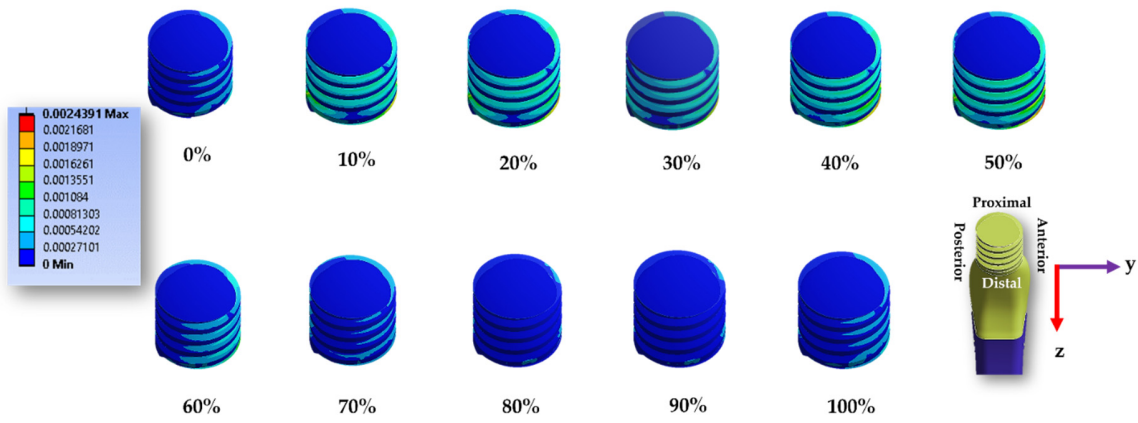

(b)

Figure S7. Sliding Distance Distribution Over Spiral Head-Neck Tapered Joint in, (a) Front and (b) Right Side View for Walking Loading Condition.



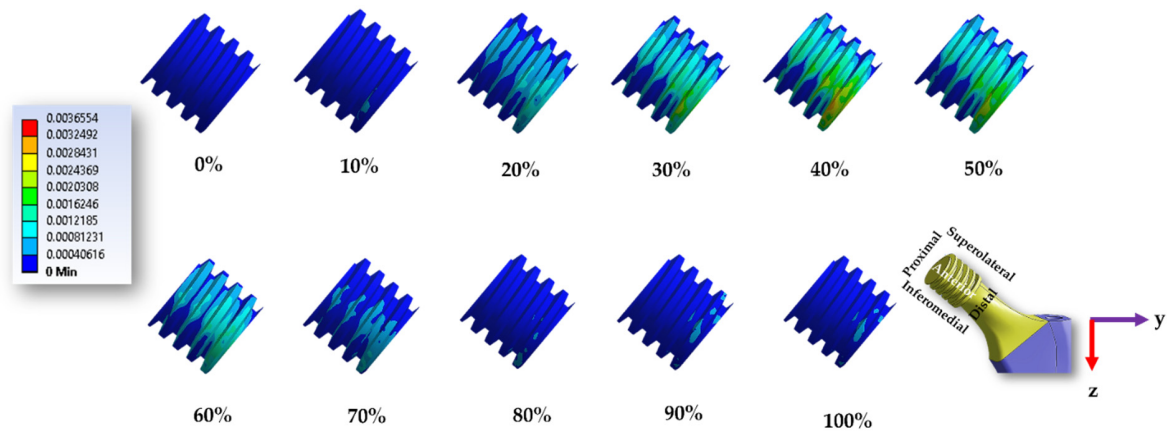

(a)

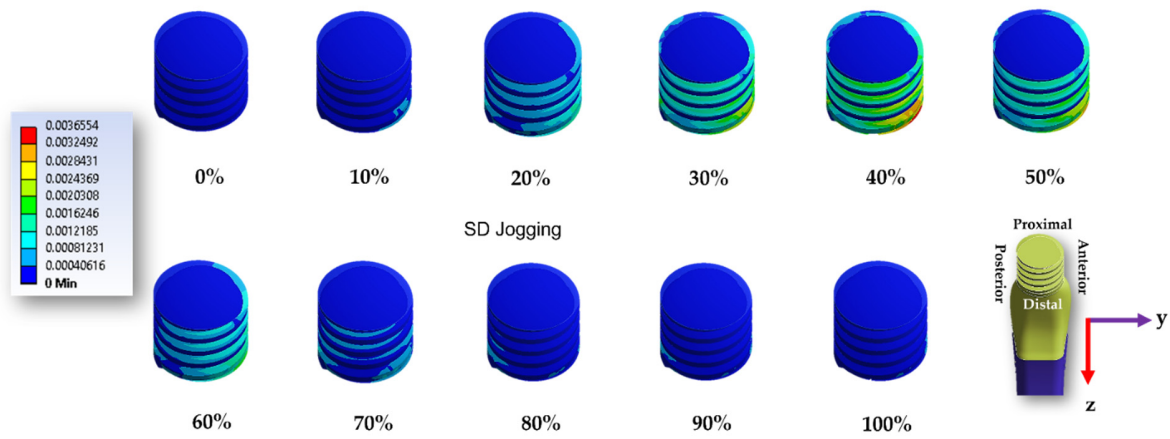

(b)

Figure S8. Sliding Distance Distribution Over Spiral Head-Neck Tapered Joint in, (a) Front and (b) Right Side View for Walking Loading Condition.
